# Supplementary material for: Rare Deletions or Large Duplications Contribute to Genetic Variation in Patients with Severe Tinnitus and Meniere Disease
Source: MDPI journal article supplement (doi:10.3390/genes15010022), 2023-12-22
Supplement: s1 [file s1]

Article

# Rare deletions and a large duplication in patients with severe tinnitus and Meniere Disease

Alba Escalera-Balsera<sup>1,2,3</sup>, Alberto M. Parra-Perez<sup>1,2,3</sup>, Alvaro Gallego-Martinez<sup>1,2,3</sup>, Lidia Frejo<sup>1,2,3,4</sup>, Juan Martin-Lagos<sup>1,2,5</sup>, Victoria Rivero de Jesus<sup>6</sup>, Paz Pérez-Vázquez<sup>7</sup>, Patricia Perez-Carpena<sup>1,2,3,8</sup>, Jose A. Lopez-Escamez<sup>1,2,3,4\*</sup>

<sup>1</sup> Otolology & Neurotology Group CTS495, Instituto de Investigación Biosanitaria, ibs.GRANADA, Universidad de Granada, 18071 Granada, Spain; albaescalera@correo.ugr.es, amparraperez@ugr.es, alvaro.gallego@ugr.es, lidia.frejonavarro@sydney.edu.au

<sup>2</sup> Division of Otolaryngology, Department of Surgery, Universidad de Granada, Granada, 18016 Granada, Spain.

<sup>3</sup> Sensorineural Pathology Programme, Centro de Investigación Biomédica en Red en Enfermedades Raras, CIBERER, 28029 Madrid, Spain.

<sup>4</sup> Meniere's Disease Neuroscience Research Program, Faculty of Medicine & Health, School of Medical Sciences, The Kolling Institute, University of Sydney, 2065 Sydney, New South Wales, Australia; jose.lopezescamez@sydney.edu.au

<sup>5</sup> Department of Otorhinolaryngology, Hospital Clínico Universitario San Cecilio, 18016 Granada, Spain; juan.martinlagos.sspa@juntadeandalucia.es

<sup>6</sup> Hospital Clínic, Department of Otorhinolaryngology, Barcelona, Spain; vriveroj@csi.cat

<sup>7</sup> Servicio de Otorrinolaringología, Hospital Universitario Central de Asturias, 33011 Oviedo, Asturias, Spain; pazperezv@gmail.com

<sup>8</sup> Department of Otorhinolaryngology, Hospital Universitario Virgen de las Nieves, 18014 Granada, Spain; percarpena@ugr.es

\* Correspondence: [jose.lopezescamez@sydney.edu.au](mailto:jose.lopezescamez@sydney.edu.au)

## Supplementary Materials

### Supplementary Figures

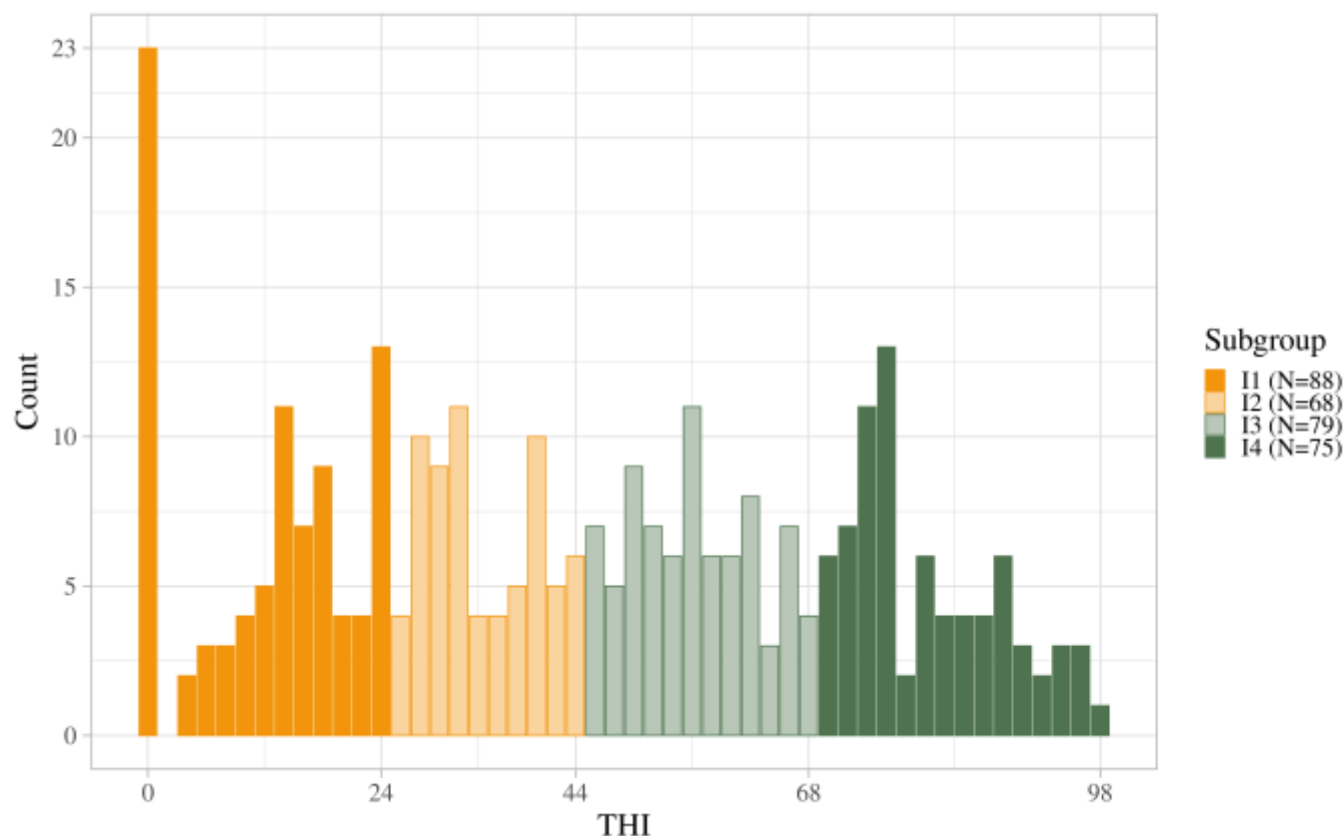

**Figure S1.** Distribution of the Tinnitus Handicap Inventory (THI) in the study cohort. The minimum value, quantiles and maximum value are defined in the x-axis; they allow subgrouping the sample in four intervals: I1, I2, I3 and I4.

24

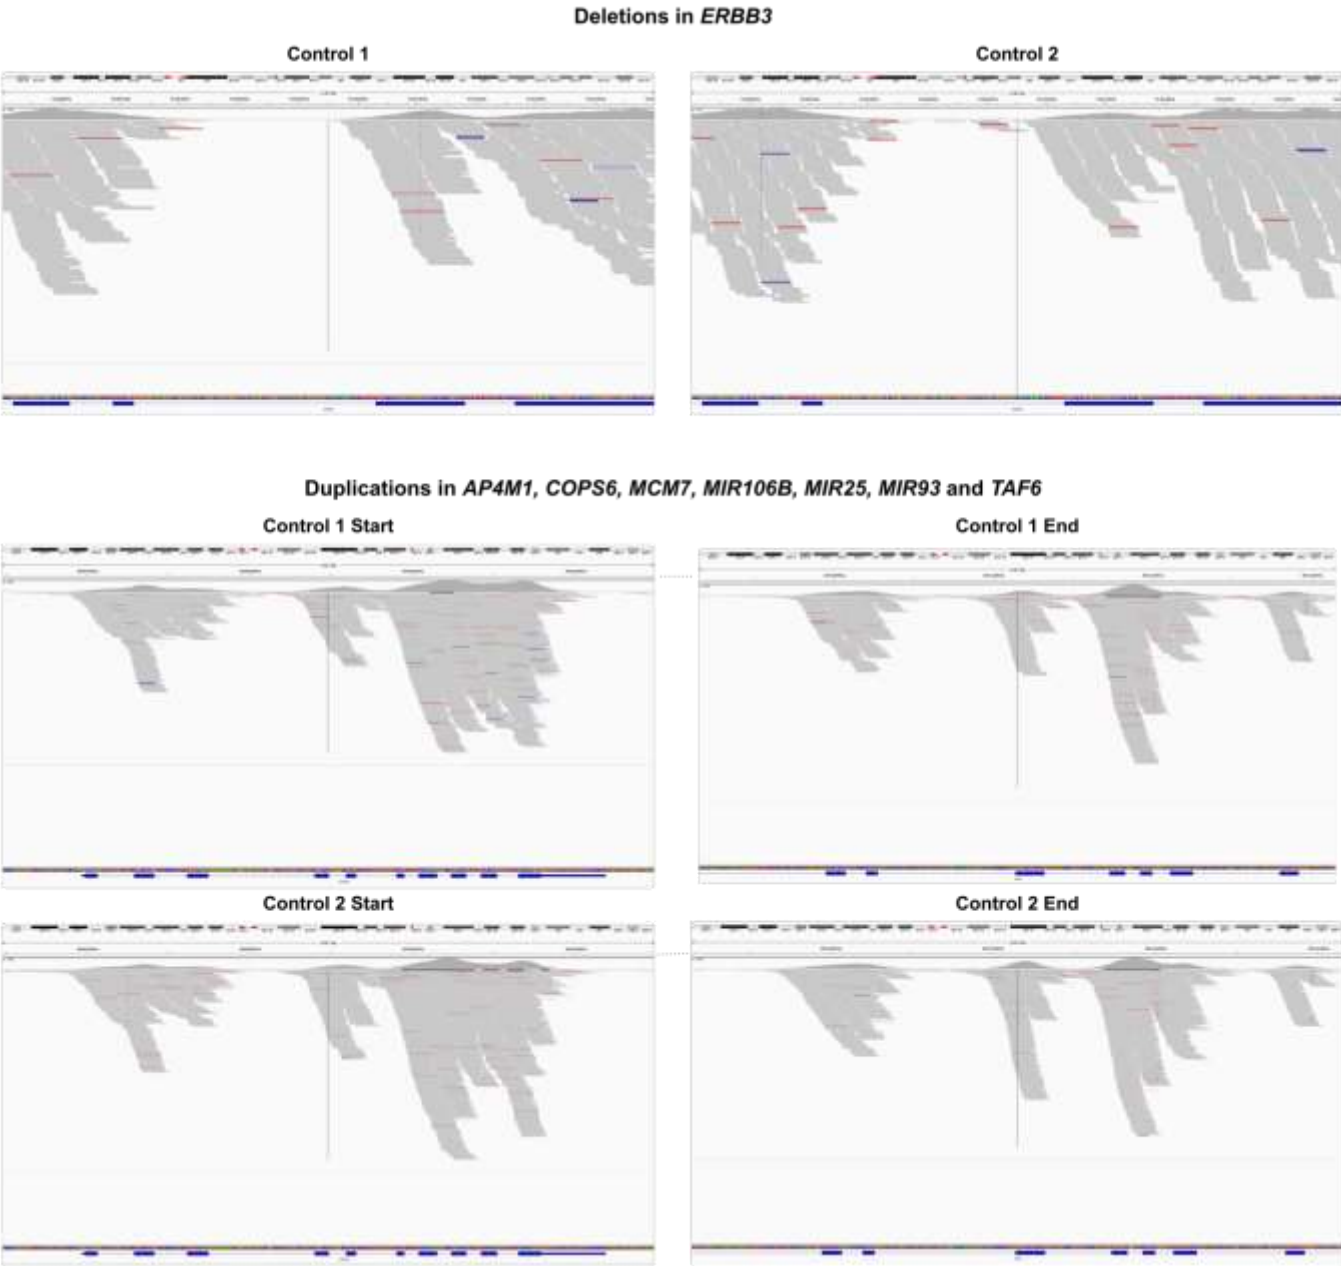

25

26 **Figure S2.** Validation in IGV in two controls without the structural variants (SVs) of the deletions in *ERBB3* gene; and  
27 the large duplication in *AP4M1*, *COPS6*, *MCM7*, *MIR106B*, *MIR25*, *MIR93* and *TAF6* genes.

28 *Supplementary Tables*29 **Table S1.** Summary of structural variants (SV) found in severe tinnitus individuals by TIDDIT.

| Chr | Start     | End       | Length | SV type     | Individuals  | Gene symbol                                            | ACMG |
|-----|-----------|-----------|--------|-------------|--------------|--------------------------------------------------------|------|
| 12  | 56100031  | 56100173  | 142    | Duplication | I4-40, I4-41 | <i>ERBB3</i>                                           | US   |
| 12  | 56100248  | 56101058  | 810    | Duplication | I4-40, I4-41 | <i>ERBB3</i>                                           | US   |
| 12  | 56101365  | 56101527  | 162    | Duplication | I4-40, I4-41 | <i>ERBB3</i>                                           | US   |
| 7   | 100089054 | 100112327 | 23,273 | Duplication | I4-28, I4-37 | <i>AP4M1, COPS6, MCM7, MIR106B, MIR25, MIR93, TAF6</i> | US   |

30 Chr: Chromosome; ACMG: American College of Medical Genetics and Genomics; US: Uncertain significance.

31

32

33 **Table S2.** American College of Medical Genetics and Genomics (ACMG) criteria for the structural variants found in severe tinnitus  
34 individuals.

|                      |                        |                                                                                                                          |
|----------------------|------------------------|--------------------------------------------------------------------------------------------------------------------------|
| Variant              |                        | NC_000012.12:g.56100028_56100172del                                                                                      |
| Gene(s)              |                        | ERBB3                                                                                                                    |
| Pathogenicity        |                        | Uncertain significance                                                                                                   |
| Criteria:            |                        |                                                                                                                          |
| Genomic Content      | Uncertain significance | This structural variant affects 1 domain in 1 protein: 1 x ERBB3_HUMAN reported in UniProt Regions.                      |
| Gene                 | Uncertain significance | This structural variant affects 1 coding gene: ERBB3.                                                                    |
| Inheritance          | Uncertain significance | No phenotypes or diseases provided.                                                                                      |
| Literature           | Benign                 | Found 1 common variant by DGV, 0 benign CNVs and 0 pathogenic CNVs reported.                                             |
| Gene/Regions Overlap | Uncertain significance | CNV has both break points in a loss-of-function causing gene, but it doesn't contain any known loss-of-function variant. |
| Variant              |                        | NC_000012.12:g.56100243_56101058del                                                                                      |
| Gene(s)              |                        | ERBB3                                                                                                                    |
| Pathogenicity        |                        | Uncertain significance                                                                                                   |
| Criteria:            |                        |                                                                                                                          |
| Genomic Content      | Uncertain significance | This structural variant affects 1 domain in 1 protein: 1 x ERBB3_HUMAN reported in UniProt Regions.                      |
| Gene                 | Uncertain significance | This structural variant affects 1 coding gene: ERBB3.                                                                    |
| Inheritance          | Uncertain significance | No phenotypes or diseases provided.                                                                                      |
| Literature           | Benign                 | Found 1 common variant by DGV, 0 benign CNVs and 0 pathogenic CNVs reported.                                             |
| Gene/Regions Overlap | Uncertain significance | CNV has both break points in a loss-of-function causing gene, but it doesn't contain any known loss-of-function variant. |

|                             |                        |                                                                                                                                                                                               |                                                                                                        |
|-----------------------------|------------------------|-----------------------------------------------------------------------------------------------------------------------------------------------------------------------------------------------|--------------------------------------------------------------------------------------------------------|
| <b>Variant</b>              |                        |                                                                                                                                                                                               | NC_000012.12:g.56101359_56101526del                                                                    |
| <b>Gene(s)</b>              |                        |                                                                                                                                                                                               | <i>ERBB3</i>                                                                                           |
| <b>Pathogenicity</b>        |                        |                                                                                                                                                                                               | Uncertain significance                                                                                 |
| <b>Criteria:</b>            |                        |                                                                                                                                                                                               |                                                                                                        |
| <b>Genomic Content</b>      | Uncertain significance | This structural variant doesn't affect any known domain, but affects 2 coding-genes.                                                                                                          |                                                                                                        |
| <b>Gene</b>                 | Uncertain significance | This structural variant affects 2 coding genes: ENSG00000257411 and <i>ERBB3</i> .                                                                                                            |                                                                                                        |
| <b>Inheritance</b>          | Uncertain significance | No phenotypes or diseases provided.                                                                                                                                                           |                                                                                                        |
| <b>Literature</b>           | Benign                 | Found 1 common variant by DGV, 0 benign CNVs and 0 pathogenic CNVs reported.                                                                                                                  |                                                                                                        |
| <b>Gene/Regions Overlap</b> | Uncertain significance | CNV has both break points in a loss-of-function causing gene, but it doesn't contain any known loss-of-function variant.                                                                      |                                                                                                        |
| <b>Variant</b>              |                        |                                                                                                                                                                                               | NC_000007.14:g.100089053_100112257dup                                                                  |
| <b>Gene(s)</b>              |                        |                                                                                                                                                                                               | <i>AP4M1</i> , <i>COPS6</i> , <i>MCM7</i> , <i>MIR106B</i> , <i>MIR25</i> , <i>MIR93</i> , <i>TAF6</i> |
| <b>Pathogenicity</b>        |                        |                                                                                                                                                                                               | Uncertain significance                                                                                 |
| <b>Criteria:</b>            |                        |                                                                                                                                                                                               |                                                                                                        |
| <b>Genomic Content</b>      | Uncertain significance | This structural variant affects 11 domains in 4 proteins: 5 x <i>MCM7</i> , HUMAN, 3 x <i>TAF6</i> , HUMAN, 2 x <i>CSN6</i> , HUMAN and 1 x <i>AP4M1</i> , HUMAN reported in UniProt Regions. |                                                                                                        |
| <b>Gene</b>                 | Uncertain significance | This structural variant affects 4 coding genes: <i>AP4M1</i> , <i>COPS6</i> , <i>MCM7</i> and <i>TAF6</i> .                                                                                   |                                                                                                        |
| <b>Inheritance</b>          | Uncertain significance | No phenotypes or diseases provided.                                                                                                                                                           |                                                                                                        |
| <b>Literature</b>           | Uncertain significance | Found 0 benign CNVs, 0 common variants by DGV and 0 pathogenic CNVs reported.                                                                                                                 |                                                                                                        |
| <b>Gene/Regions Overlap</b> | Uncertain significance | No condition is met.                                                                                                                                                                          |                                                                                                        |
