# Supplementary material for: Rare Deletions or Large Duplications Contribute to Genetic Variation in Patients with Severe Tinnitus and Meniere Disease
Source: Genes (Basel). 2023 Dec 22;15(1):22. doi: 10.3390/genes15010022 (PMC10815708; doi:10.3390/genes15010022)
Supplement: Supplementary file 1 [file genes-15-00022-s001.zip]

Archive with 5 entries (5 files):
- FigureS2.png
- R1_genes-2755127_supplementary.pdf
- TableS1.xlsx
- TableS2.xlsx
- FigureS1.png
