# Supplementary material for: Rare Deletions or Large Duplications Contribute to Genetic Variation in Patients with Severe Tinnitus and Meniere Disease
Source: Genes (Basel). 2023 Dec 22;15(1):22. doi: 10.3390/genes15010022 (PMC10815708; doi:10.3390/genes15010022)
Supplement: Supplementary file 1 [file genes-15-00022-s001.zip › TableS1.xlsx]

## Sheet: Table S1
Table S1. Summary of structural variants (SV) found in severe tinnitus individuals by TIDDIT.
Chr	Start	End	Length (bp)	SV type	Individuals	Gene symbol	ACMG
12	56100031	56100173	142	Duplication	I4-40, I4-41	ERBB3	US
12	56100248	56101058	810	Duplication	I4-40, I4-41	ERBB3	US
12	56101365	56101527	162	Duplication	I4-40, I4-41	ERBB3	US
7	100089054	100112327	23273	Duplication	I4-28, I4-37	AP4M1, COPS6, MCM7, MIR106B, MIR25, MIR93, TAF6	US
Chr: Chromosome; ACMG: American College of Medical Genetics and Genomics; US: Uncertain significance.
