# Supplementary material for: Rare Deletions or Large Duplications Contribute to Genetic Variation in Patients with Severe Tinnitus and Meniere Disease
Source: Genes (Basel). 2023 Dec 22;15(1):22. doi: 10.3390/genes15010022 (PMC10815708; doi:10.3390/genes15010022)
Supplement: Supplementary file 1 [file genes-15-00022-s001.zip › TableS2.xlsx]

## Sheet: TableS2
Table S2. American College of Medical Genetics and Genomics (ACMG) criteria for the structural variants found in severe tinnitus individuals.
Variant	NC_000012.12:g.56100028_56100172del
Gene(s)	ERBB3
Pathogenicity	Uncertain significance
Criteria:
Genomic Content	Uncertain significance	This structural variant affects 1 domain in 1 protein: 1 x ERBB3_HUMAN reported in UniProt Regions.
Gene	Uncertain significance	This structural variant affects 1 coding gene: ERBB3.
Inheritance	Uncertain significance	No phenotypes or diseases provided.
Literature	Benign	Found 1 common variant by DGV, 0 benign CNVs and 0 pathogenic CNVs reported.
Gene/Regions Overlap	Uncertain significance	CNV has both break points in a loss-of-function causing gene, but it doesn't contain any known loss-of-function variant.
Variant	NC_000012.12:g.56100243_56101058del
Gene(s)	ERBB3
Pathogenicity	Uncertain significance
Criteria:
Genomic Content	Uncertain significance	This structural variant affects 1 domain in 1 protein: 1 x ERBB3_HUMAN reported in UniProt Regions.
Gene	Uncertain significance	This structural variant affects 1 coding gene: ERBB3.
Inheritance	Uncertain significance	No phenotypes or diseases provided.
Literature	Benign	Found 1 common variant by DGV, 0 benign CNVs and 0 pathogenic CNVs reported.
Gene/Regions Overlap	Uncertain significance	CNV has both break points in a loss-of-function causing gene, but it doesn't contain any known loss-of-function variant.
Variant	NC_000012.12:g.56101359_56101526del
Gene(s)	ERBB3
Pathogenicity	Uncertain significance
Criteria:
Genomic Content	Uncertain significance	This structural variant doesn't affect any known domain, but affects 2 coding-genes.
Gene	Uncertain significance	This structural variant affects 2 coding genes: ENSG00000257411 and ERBB3.
Inheritance	Uncertain significance	No phenotypes or diseases provided.
Literature	Benign	Found 1 common variant by DGV, 0 benign CNVs and 0 pathogenic CNVs reported.
Gene/Regions Overlap	Uncertain significance	CNV has both break points in a loss-of-function causing gene, but it doesn't contain any known loss-of-function variant.
Variant	NC_000007.14:g.100089053_100112257dup
Gene(s)	AP4M1, COPS6, MCM7, MIR106B, MIR25, MIR93, TAF6
Pathogenicity	Uncertain significance
Criteria:
Genomic Content	Uncertain significance	This structural variant affects 11 domains in 4 proteins: 5 x MCM7, HUMAN, 3 x TAF6, HUMAN, 2 x CSN6, HUMAN and 1 x AP4M1, HUMAN reported in UniProt Regions.
Gene	Uncertain significance	This structural variant affects 4 coding genes: AP4M1, COPS6, MCM7 and TAF6.
Inheritance	Uncertain significance	No phenotypes or diseases provided.
Literature	Uncertain significance	Found 0 benign CNVs, 0 common variants by DGV and 0 pathogenic CNVs reported.
Gene/Regions Overlap	Uncertain significance	No condition is met.
